# Supplementary material for: The synthesis and development of poly(ε-caprolactone) conjugated polyoxyethylene sorbitan oleate-based micelles for curcumin drug release: an in vitro study on breast cancer cells
Source: Royal Society of Chemistry journal article supplement (doi:10.1039/d3ra03660j), 2023-01-01
Supplement: d3ra03660j1.pdf [file d3ra03660j1.pdf]

## Supplementary file

**Table 1:** accuracy and precision of UV-Vis spectroscopy method for curcumine

| Standard solution concentration ( $\mu\text{g/mL}$ ) | Accuracy    | Precision (RSD %) |
|------------------------------------------------------|-------------|-------------------|
| 1                                                    | 88.63849765 | 5                 |
| 2                                                    | 109.4209703 | 5.329774327       |
| 3                                                    | 102.0552947 | 6.942986042       |
| 4                                                    | 101.971831  | 6.555547774       |
| 5                                                    | 100.9827856 | 3.851956345       |
| 6                                                    | 98.23682838 | 6.77115196        |
| 7                                                    | 99.40532081 | 3.566206767       |

**Table 2.** The type of kinetics equation explained the mechanism release of Cur from the PCL-T-M nano-system.

| <b>Model</b>     | <b>Equation</b>                                                                                              |
|------------------|--------------------------------------------------------------------------------------------------------------|
| First-order      | $F=100 \times [1 - \text{Exp}(-k_1 \times t)]$                                                               |
| zero-order       | $F=F_0 + k_0 \times t$                                                                                       |
| Higuchi          | $F=F_0 + k_H \times t^{0.5}$                                                                                 |
| Korsmeyer-Peppas | $F=F_0 + k_{KP} \times t^n$                                                                                  |
| Hixson-Crowel    | $F=100 \times [1 - (1 - k_{HC} \times t)^3]$                                                                 |
| Makoid-Banakar   | $F= k_{MB} \times t^n \times \text{Exp}(-kt)$                                                                |
| Weibull          | $F=100 \times \{1 - \text{Exp}[-(t^\beta)/\alpha]\}$                                                         |
| Logistic         | $F=100 \times \text{Exp}[\alpha + \beta \times \log(t)] / \{1 + \text{Exp}[\alpha + \beta \times \log(t)]\}$ |
| Gompertz         | $F=100 \times \text{Exp}\{-\alpha \times \text{Exp}[-\beta \times \log(t)]\}$                                |

**Table 3.** The parameter of the kinetics model at pH 7.4 and 5.5 from PCL-T-M-Cur.

| Model            | Parameter | PBS (7.4) | PBS (5.5)      |
|------------------|-----------|-----------|----------------|
| First-order      | $k_1$     | 0.008     | <b>0.026</b>   |
|                  | $R^2$     | 0.784     | <b>0.929</b>   |
|                  | AIC       | 123.91    | <b>120.41</b>  |
| Zero-order       | $k_0$     | 0.461     | <b>0.757</b>   |
|                  | $R^2$     | 0.551     | <b>0.410</b>   |
|                  | AIC       | 138.39    | <b>156.58</b>  |
| Higuchi          | $k_H$     | 5.049     | <b>8.382</b>   |
|                  | $R^2$     | 0.964     | <b>0.935</b>   |
|                  | AIC       | 93.43     | <b>119.04</b>  |
| Korsmeyer-Peppas | $k_{KP}$  | 6.704     | <b>13.037</b>  |
|                  | $n$       | 0.436     | <b>0.4</b>     |
|                  | $R^2$     | 0.973     | <b>0.9652</b>  |
|                  | AIC       | 88.99     | <b>109.35</b>  |
| Hixson-Crowell   | $k_{HC}$  | 0.002     | <b>0.007</b>   |
|                  | $R^2$     | 0.720     | <b>0.887</b>   |
|                  | AIC       | 128.361   | <b>128.453</b> |
| Makoid-banakar   | $k_{MB}$  | 4.495     | <b>8.849</b>   |
|                  | $n$       | 0.600     | <b>0.563</b>   |
|                  | $k$       | 0.003     | <b>0.003</b>   |
|                  | $R^2$     | 0.992     | <b>0.988</b>   |
|                  | AIC       | 67.659    | <b>91.082</b>  |
| Weibull          | $\alpha$  | 18.04     | <b>12.401</b>  |
|                  | $\beta$   | 0.553     | <b>0.668</b>   |
|                  | $R^2$     | 0.987     | <b>0.988</b>   |
|                  | AIC       | 77.111    | <b>91.682</b>  |
| Logistic         | $\alpha$  | -3.092    | <b>-2.926</b>  |
|                  | $\beta$   | 1.556     | <b>2.223</b>   |
|                  | $R^2$     | 0.993     | <b>0.980</b>   |
|                  | AIC       | 65.45     | <b>99.47</b>   |
| Gompertz         | $\alpha$  | 4.158     | <b>4.655</b>   |
|                  | $\beta$   | 0.904     | <b>1.519</b>   |
|                  | $R^2$     | 0.996     | <b>0.963</b>   |
|                  | AIC       | 56.66     | <b>110.105</b> |
